# Supplementary material for: Genotyping of the Major SARS-CoV-2 Clade by Short-Amplicon High-Resolution Melting (SA-HRM) Analysis
Source: MDPI journal article supplement (doi:10.3390/genes12040531), 2021-04-05

**Supplementary Figure 1:** Non-normalized  $-(d/dT)/\text{temperature}$  SA-HRM traces, full length [A]. The peaks corresponding to non-GR samples (in red, shifted to the right in the images below and identified as such after normalization, amplified to better visualization in [B]) are smaller than the peaks of the GR samples (in gray, shifted to the left). This means that the signal generated upon de denaturation of the non-GR PCR products generates a weaker signal in comparison to the GR PCR products, hence the increased noise of that group upon normalization.

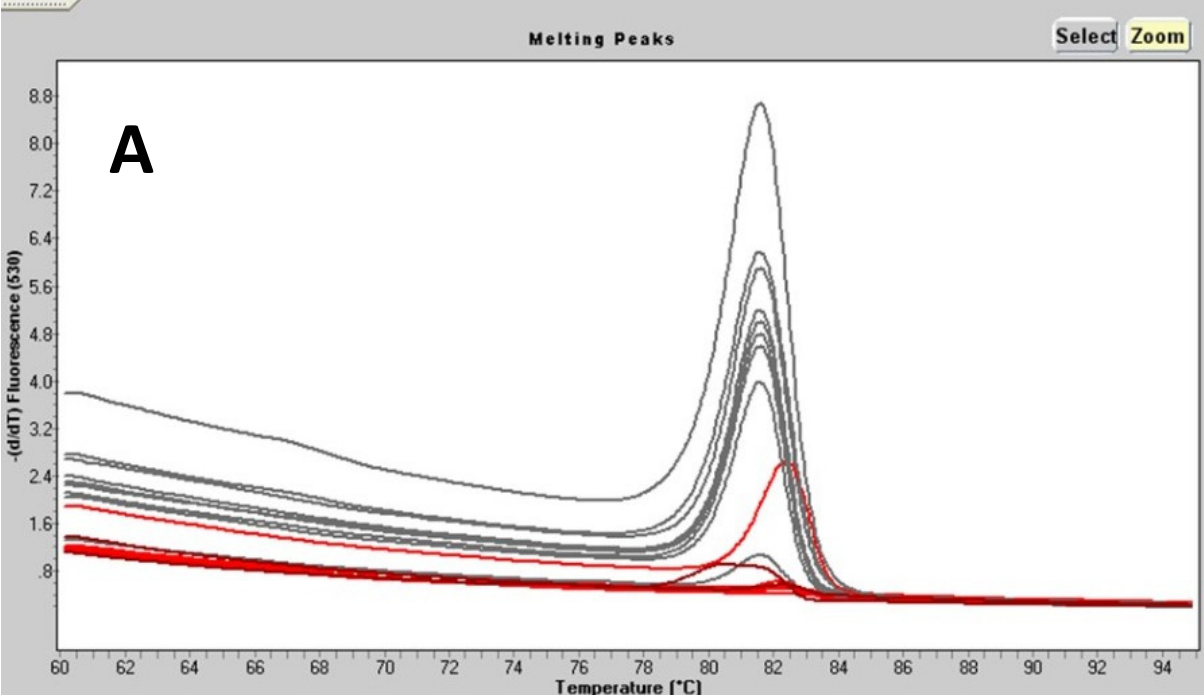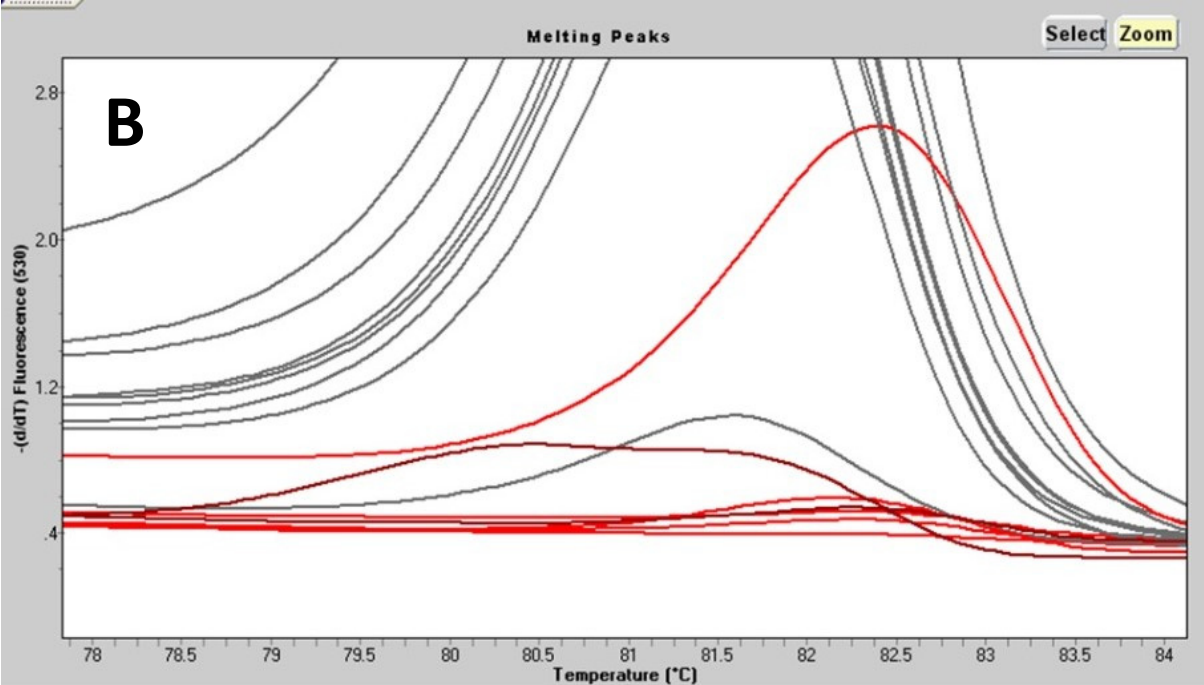

Supplement: s1 [file s1]
